# Supplementary material
Source: PubMed Central journal article supplement (PMC2670657)
Supplement: 00619.2008_3.pdf [file 00619.2008_3.pdf]

## Supplementary Data

### **Supplementary Figure 1. $\beta\gamma$ -methylene ATP as a selective probe of recombinant eNPP1 expressed in HEK293 cells**

A: intact HEK293 cells stably transfected with GFP (HEK-GFP) were pulsed with 100 nM exogenous ATP in the absence (■) or presence (□) of 300  $\mu$ M  $\beta\gamma$ -methylene ATP (MeATP); (●) cell free control in the presence of exogenous ATP. B: intact HEK293 cells stably transfected with human NPP1 (HEK-NPP1) were pulsed with 100 nM exogenous ATP in the absence (■) or presence (□) of 300  $\mu$ M MeATP; (●) cell free control in the presence of exogenous ATP; *Insert*, western blot of native HEK293 (HEK), HEK-NPP1, and HEK-GFP cell extracts probed for NPP1 (top), GFP (middle), and actin (bottom). Data represent the average  $\pm$  range from representative experiments repeated three times using  $10^6$  cells suspended in 200  $\mu$ l BSS at 23°C. C, D: HPLC chromatograms of extracellular media from intact HEK-GFP cells or HEK-NPP1 cells pulsed with 20  $\mu$ M exogenous  $\epsilon$ -ATP and incubated for the indicated times.

### **Supplementary Figure 2. Levamisole-sensitive alkaline phosphatase activity in L cells and cultured VSMC**

Alkaline phosphatase activity, measured by pNPP hydrolysis, in lysates of VSMC (□) or two-day cAMP-differentiated (1 mM CPT-cAMP) L-cells (■). Inset illustrates the activity in VSMC lysates using an expanded Y-axis. Whole cell lysates were assayed in the absence or presence of 5 mM levamisole (Lev). Data represent the means  $\pm$  SE from four separate experiments with each experiment performed in duplicate.
