# Supplementary material
Source: PubMed Central journal article supplement (PMC2670657)

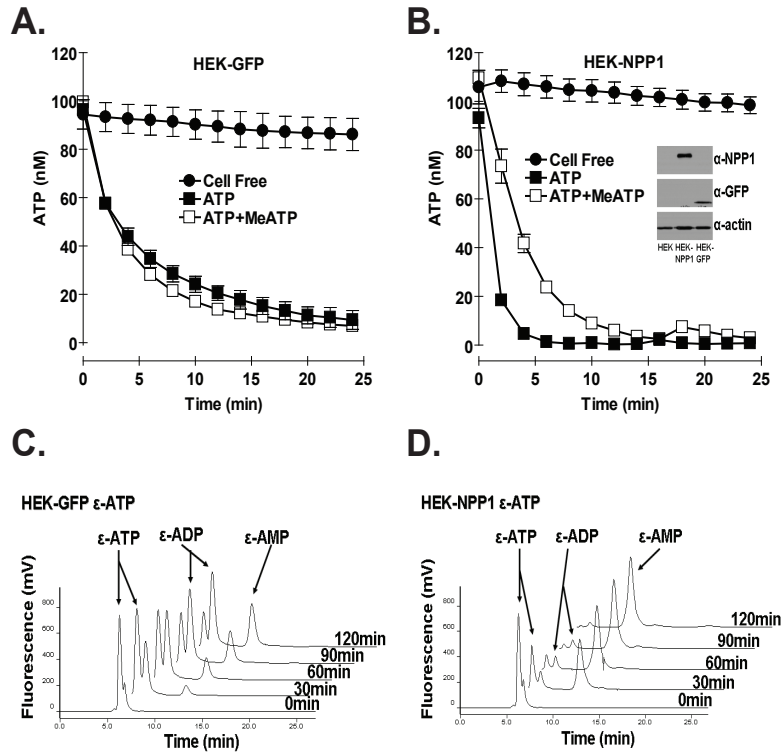

Supplemental Figure 1

Supplement: 00619.2008_1.pdf [file 00619.2008_1.pdf]

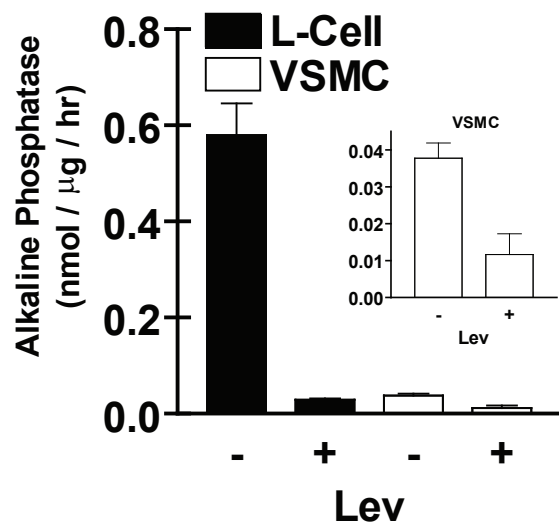

Supplementary Figure 2

Supplement: 00619.2008_2.pdf [file 00619.2008_2.pdf]
